# Supplementary material
Source: PubMed Central journal article supplement (PMC137800)

Looking times during the habituation phase

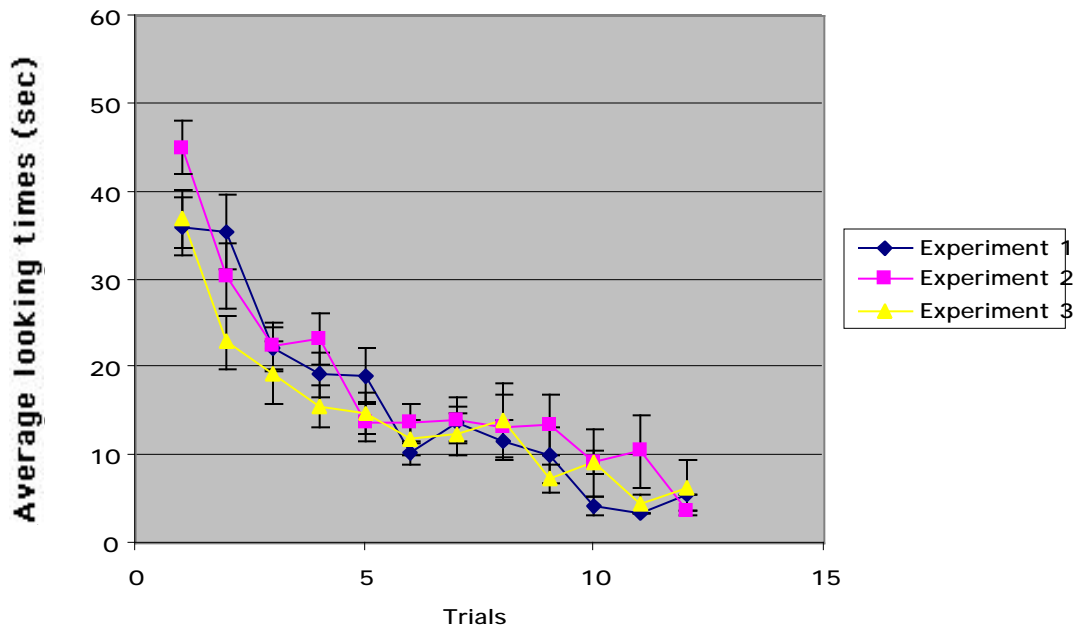

Supplement: pnas_232472899_2.pdf [file pnas_232472899_2.pdf]

Average number of habituation trials

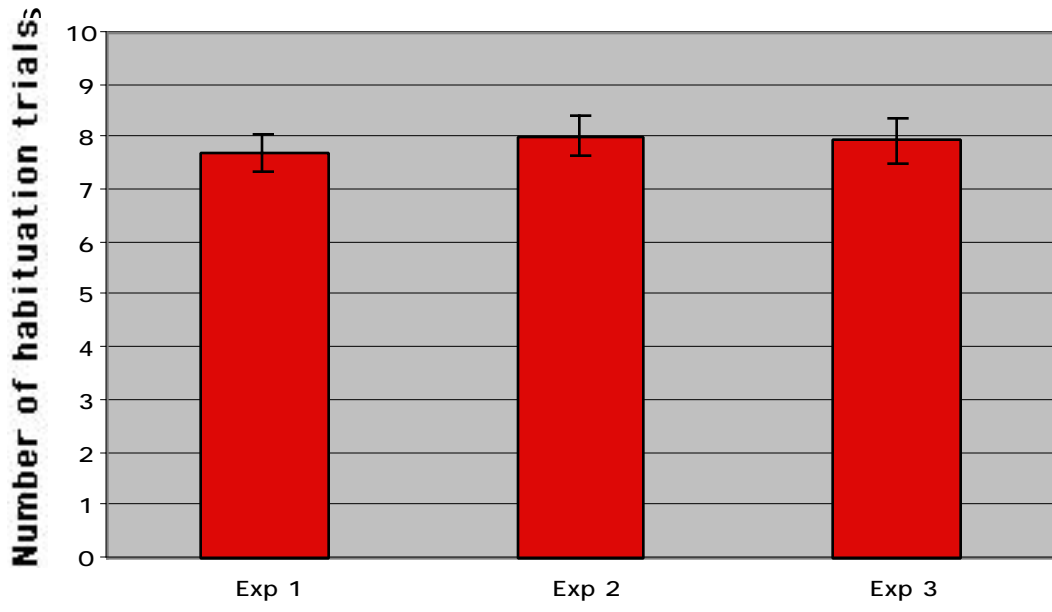

Supplement: pnas_232472899_4.pdf [file pnas_232472899_4.pdf]

Average exposure to habituation sequences

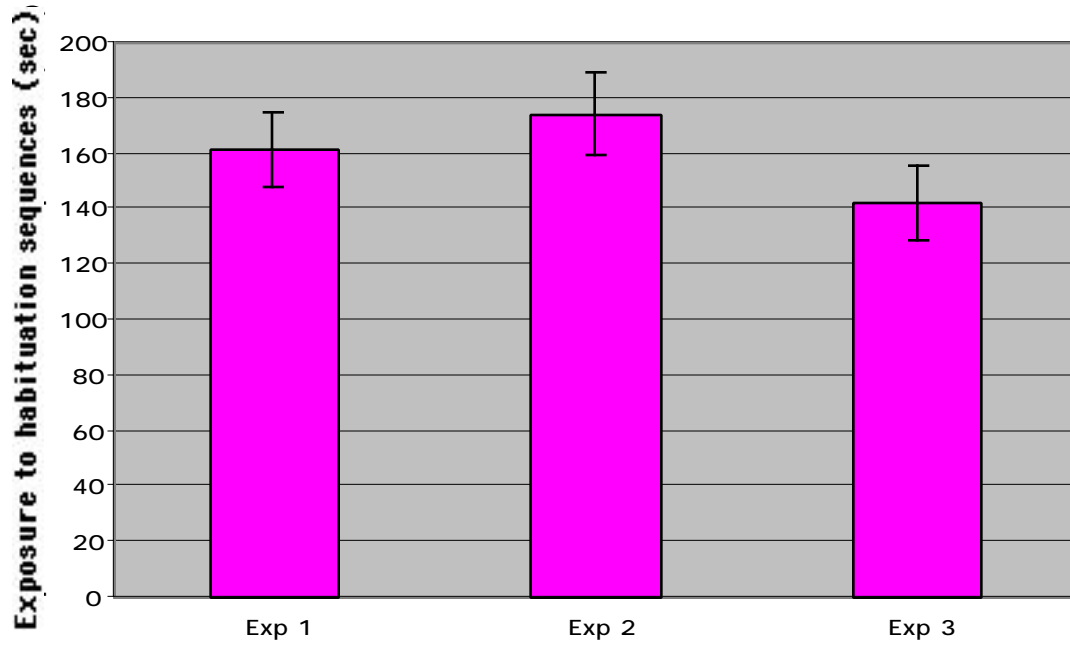

Supplement: pnas_232472899_6.pdf [file pnas_232472899_6.pdf]
